1 **Proteomic analyses of the Arabidopsis cap-binding complex define core set**  
2 **and TOR-dependent protein components**

3  
4 Annemarie Matthes<sup>1,2\*</sup>, Laurence Ouibrahim<sup>1,3\*</sup>, Cécile Lecampion<sup>1</sup>, Carole Caranta<sup>3</sup>, Marlène  
5 Davanture<sup>4</sup>, Régine Lebrun<sup>5</sup>, Yohann Couté<sup>6</sup>, Mathieu Baudet<sup>6</sup>, Christian Meyer<sup>2#</sup>, Christophe  
6 Robaglia<sup>1#</sup>

7  
8  
9 1 Aix Marseille Université, CEA, CNRS, BIAM, Luminy Génétique et Biophysique des Plantes,  
10 Marseille, France F-13009

11 2 Institut Jean-Pierre Bourgin (IJPB), INRAE, AgroParisTech, Université Paris-Saclay, 78000  
12 Versailles, France

13 3 GAFL, INRAE, Montfavet, France

14  
15 4 PAPPSO - Plateforme d'Analyse Protéomique de Paris Sud Ouest, Gif sur Yvette, France

16  
17 5 Plate-forme Protéomique, Marseille Protéomique (MaP), IMM, FR 3479, CNRS, 31 Chemin J.  
18 Aiguier, 13402, Marseille Cedex 9, France

19  
20 6 Université Grenoble Alpes, INSERM, CEA, UMR BioSanté U1292, CNRS, CEA, FR2048  
21 38000, Grenoble, France

22

23

24

25

26

27 \*co-first authors

28

29 # corresponding authors: [christophe.robaglia@univ-amu.fr](mailto:christophe.robaglia@univ-amu.fr); [christian.meyer@inrae.fr](mailto:christian.meyer@inrae.fr)

30

31

32  
33  
34  
35  
36  
37  
38  
39  
40  
41  
42  
43  
44  
45  
46  
47  
48  
49  
50  
51

## Abstract

The eukaryotic cap-binding complex (CBC) is a hub for regulations affecting mRNA behaviour including translation, degradation and storage. Beside the core eukaryotic translation initiation factors, other proteins, many of which are yet unknown, are thought to interact stably or transiently with the CBC depending on cell status. The prototype of these regulators is the animal eIF4E binding protein (4E-BP), a direct target of the TOR (Target of Rapamycin) kinase that competes with the cap-binding protein eIF4E, thus repressing translation. In plants, no functional homologs of 4E-BP have so far been characterized. In this work we performed several deep proteomic analyses of the Arabidopsis CBC after cap-affinity purification from wild-type plants. We also investigated the CBC in eIF4E mutant plants, Arabidopsis lines with lower TOR activity, or during infection with eIF4E-dependent potyviruses, conditions which are all affecting translation at the initiation level. These analyses allowed us to define a limited core set of CBC components, which were detected in all samples. Interestingly, we identified proteins, like AGO1 or VCS, which were always detected in conditions where either TOR or mRNA translation were reduced. Meta-analysis of these data revealed several new plant interactors of the CBC, potentially defining pathways related to mRNA stability and degradation, metabolism and viral life cycle. A search for eIF4E binding motifs identified several new potential 4E-BP relatives in plants.

52  
53  
54

## Introduction

55  
56  
57  
58  
59  
60  
61  
62  
63  
64  
65  
66

Protein synthesis is one of the cell's most energy consuming processes and is thus regulated at many levels and particularly at the level of the initiation of mRNA translation (Shah et al, 2013). Most eukaryotic mRNA are terminated at the 5' end by a 7-methyl guanylate nucleotide (m<sup>7</sup>GpppN), called the cap, which is recognized by a conserved protein complex, (cap-binding complex, CBC) mediating access to the ribosomal 40S subunit. The CBC is structured by the eIF4G scaffold that bridges the eIF4E cap-binding protein with the eIF4A helicases, the multi-subunit eIF3 and the 40S ribosomal subunit, to form the 43S translation preinitiation complex in association with mRNA (Jackson et al, 2010; Browning and Bailey-Serres, 2015; Kumar et al, 2016). eIF4E and eIF4G are thought to be the ancestral forms, while in flowering plants a distinct CBC is structured by eIF(iso)4E and eIF(iso)4G isoforms (Patrick and Browning, 2012). The CBC is a

67 critical point for modulation of mRNA fate across diverse eukaryotic species. Several  
68 physiologically regulated proteins were found to interfere with the interaction between eIF4E and  
69 eIF4G modulating translation efficiency. Among the best-known examples are eIF4E-binding  
70 proteins (4E-BPs) found in several metazoan and fungal species (Mamane et al, 2006). 4E-BPs are  
71 phosphorylated by the highly conserved Target of Rapamycin (TOR) kinase, itself activated by  
72 growth promoting factors such as sugars, amino-acids and hormones (Condon and Sabatini, 2019;  
73 Ingargiola et al, 2020). In its phosphorylated state, 4E-BP does not interfere with eIF4E to eIF4G  
74 binding, thus allowing protein synthesis to proceed freely, promoting cell proliferation and growth.  
75 In the dephosphorylated state, when TOR is inactivated by nutrient starvation or stress conditions,  
76 4E-BP sequesters eIF4E to prevent 43S complex formation, leading to global repression of  
77 translation and the promotion of cell survival and quiescence. The existence of regulators similar  
78 to animal 4E-BPs was for a long time debated in plants. Recently, two Arabidopsis eIF4E protein  
79 interactors CBE1 and CERES were identified but their functions seem different from the ones of  
80 animal 4E-BPs. CBE1 was found to be required for proper cell cycle gene expression (Patrick et  
81 al, 2018), and CERES was proposed to replace eIF4G allowing the formation of an alternative 43S  
82 preinitiation complex (Toribio et al, 2019). Moreover, the link between these proteins and the  
83 TOR pathway has not been clearly established, although the phosphorylation of CBE1 was found  
84 to be regulated by TOR activity (Scarpin et al, 2020). An Arabidopsis ortholog of the GIGYF  
85 alternative CBC component was also found to be a target of TOR (van Leene et al, 2019). It is  
86 known that mammalian LARP1 protein (La-related protein1) binds cap analog and blocks eIF4F  
87 formation (Lahr et al, 2017). The Arabidopsis orthologs of LARP1 have been shown to be involved  
88 in the regulation of mRNA stability after heat stress (Merret et al, 2013) and to be phosphorylated  
89 in a TOR-dependent manner (van Leene et al, 2019; Scarpin et al, 2020).

90 The critical role of the CBC in translational regulations is further highlighted by its frequent  
91 targeting by viruses. The Hantavirus N protein replaces eIF4E and eIF4G attracting the ribosome  
92 to the viral RNA (Mir and Panganiban, 2008). Picornaviruses infection leads to eIF4G cleavage  
93 promoting shut-off of host mRNA translation, while translation of the viral RNA is favored by the  
94 presence of an Internal Ribosome Entry Sites (IRES). The Potyviral 5' genome linked protein  
95 (VPg) binds eIF4E and eIF(iso)4E promoting viral translation (Khan et al, 2008; Eskelin et al,  
96 2011). A specific structure at the 3' end of several plant RNA viral genomes (3'-cap-independent  
97 translation enhancer or 3'CITE) can also directly recruit eIF4E and stimulate viral translation  
98 (Simon and Miller, 2013). eIF4E proteins have repeatedly evaded their capture by viral proteins or  
99 RNA, providing viral resistance in several plant species (Robaglia and Caranta, 2006; Nieto et al,  
100 2006; Poulicard et al, 2016)

101 Purification and biochemical analysis of the CBC can be performed through affinity purification  
102 to resin-coupled m7GTP, which acts as a cap analogue (Sonenberg et al, 1979). Copurifying  
103 proteins were found to be considerably enriched for proteins involved in translation initiation and  
104 in the regulation of protein synthesis in animals as well as in plants. Indeed, in an initial study  
105 analyzing the composition of the CBC in Arabidopsis, about 20 new proteins not previously known  
106 to be part of the Arabidopsis CBC were identified (Bush et al, 2009). Several of these candidates  
107 were later confirmed as genuine components of the CBC which could regulate translation such as  
108 the CBE1 protein (At4g01290, Patrick et al, 2018), the GRP8 RNA binding glycine rich protein  
109 (At4g39260) involved in RNA splicing and flowering (Steffen et al, 2019) and the EXA1 GIGYF-  
110 like protein (At5g42950), involved in RNA virus replication and defense gene expression  
111 (Hashimoto et al, 2016; Wu et al, 2019).

112 In the present work we took advantage of the recent progresses in the sensitivity, speed and  
113 resolution of mass spectrometers to perform a wide analysis of affinity-purified CBC proteomic  
114 data from Arabidopsis plants. One of the main goals of this study was to identify the most stable  
115 and ubiquitous components of the Arabidopsis core CBC by identifying proteins which were  
116 always present in the proteomic analyses. We present a detailed analysis of the CBC in wild-type  
117 (WT) Arabidopsis and compared it to several lines where translation initiation is affected by  
118 different causes. These are a mutant devoid of the eIF4E protein, plants infected by the  
119 Watermelon Mosaic potyvirus (WMV) and plants where the TOR pathway was repressed by  
120 genetic or chemical repression. This wide study allows us to identify invariant components of the  
121 CBC in plants as well as those that appear in the CBC only upon TOR repression or viral infection.  
122 These proteins could provide new leads for the study of translational regulation in plants.

123

124

125

## 126 **Materials and Methods**

127

### 128 **Plant material and growth conditions**

129 Experiments are summarized in Table I. Arabidopsis Col0 ecotype was the WT background for  
130 most experiments excepted for experiments with TOR inducible RNAi lines which were  
131 performed with Landsberg *erecta* ecotype. TOR RNAi constitutive line 35.7, TOR RNAi inducible  
132 lines 5.2 and 6.3 and GUS control line were described in Deprost et al, 2007. The eIF4E KO  
133 mutant line SALK-145583 was described in Bastet et al, 2018.

134 For experiments G1 to G4, and M1 to M3, 100mg sterilized seeds were grown in liquid modified  
135 Hoagland medium, with agitation for 8 days after germination before either induction or  
136 harvesting. Induction of the TOR RNAi constructs were performed by adding ethanol to 0.1%  
137 and overnight incubation before harvesting (Deprost et al, 2007).

138 Experiments G5 and G6 were performed with plants grown in soil for 35d. Watermelon Mosaic  
139 Virus inoculation was performed by carborundum abrasion of four leaves of each plant at 28d with  
140 phosphate buffer (Ouibrahim et al, 2015).

141 For experiments L3 and L4, plants were grown hydroponically in boxes filled with 100ml of  
142 modified Hoagland medium. The media was changed every week and AZD-8055, a strong and  
143 specific TOR kinase inhibitor (Montané and Menand, 2013), was added directly to the medium at  
144 1  $\mu$ M in DMSO, after 3 weeks of culture followed by 15 min incubation (sample L3). Controls  
145 boxes received an equal volume of DMSO (sample L4).

146

#### 147 **Cap-binding affinity purification**

148 Plant material was blotted dry, weighted and frozen in liquid N<sub>2</sub>, finely grounded before addition  
149 of extraction buffer (1mg/ml) and homogenization. Extraction buffer was 40 mM HEPES buffer  
150 containing 0.1M KCl, 10% (v/v) glycerol, 1 mM DTT, 0.3% (w/v) CHAPS containing protease  
151 inhibitors (1 tablet Biorad/10ml ; 1/100 v/v PMSF). Phosphatase inhibitors were also added in L3  
152 and L4 experiments. Extracts were clarified at 15000 rpm at 4°C in SW41 rotor for 10 min in a  
153 Beckman ultracentrifuge, protein concentration in the supernatant (usually around 2mg/ml) was  
154 measured using the Bradford assay. Two mg of proteins in buffer were mixed with 50ul 7-Methyl-  
155 GTP- Sepharose 4B (GE Healthcare) previously equilibrated with extraction buffer, and incubated  
156 overnight at 4°C on a rotating wheel, before being loaded onto mini-columns. The columns were  
157 washed with 4ml of extraction buffer, then with 1ml of extraction buffer containing 0.1 mM GTP,  
158 elution was done with 50-100ul of 5mM m<sup>7</sup>GTP. In experiments L3 and L4, the supernatant was  
159 preincubated with Sepharose 4B for removing proteins binding unspecifically to this support.  
160 Experiment G4 was performed with plain Sepharose 4B instead of 7-Methyl-GTP- Sepharose 4B.  
161 Samples were either sent and processed directly by the platforms or proteins were separated on  
162 polyacrylamide gels (10%) and lanes were cut out, digested by trypsin and analyzed by MS/MS as  
163 previously described (Dobrenel et al. 2016). Briefly, peptides obtained after trypsin digestion were  
164 analyzed by nano LC-MS/MS on a NanoLC-Ultra system (Eksigent). Eluted peptides were  
165 analyzed with a Q-Exactive mass spectrometer (Thermo Electron) using a nano-electrospray  
166 interface (non-coated capillary probe, 10  $\mu$  i.d; New Objective). Peptides and the corresponding  
167 proteins were identified and grouped with X!TandemPipeline using the X!Tandem Piledriver

168 (2015.04.01) release and the TAIR10 protein library with the phosphorylation of serine, threonine  
169 and tyrosine as a potential peptide modification. Precursor mass tolerance was 10 ppm and  
170 fragment mass tolerance was 0.02 Th. Identified proteins were filtered and grouped using the  
171 X!TandemPipeline v3.3.41. Data filtering was achieved according to a peptide E-value lower than  
172 0.01. The false discovery rate (FDR) was estimated to 0.92%.

173 Samples were processed and analyzed by core facilities: Edyp <http://www.edyp.fr/web/> (G1 to  
174 G6); PAPPSO <http://pappso.inrae.fr/> (M1 to M3); Marseille proteomique [https://marseille-  
175 proteomique.univ-amu.fr/](https://marseille-proteomique.univ-amu.fr/) (L3 and L4) (Table 1). During all procedures great care was exerted to  
176 minimize contamination by human or animal keratins.

177

### 178 **Accession to the raw data**

179 The raw data have been deposited to the ProteomeXchange Consortium via the PRIDE (Perez-  
180 Rivero et al, 2019) partner repository under the following dataset identifiers:

181 Experiments G1 to G6: PXD028376

182 Experiments M1 to M3: PXD028533

183 Experiments L3 and L4: PXD029102

184

185 **Polysome preparation and analysis.** Polysomes were prepared and fractionated exactly as  
186 described by Lecampion et al, 2016.

187

188

### 189 **Results and discussion**

190

#### 191 **Core proteins of the Arabidopsis cap-binding complex.**

192 Four different sets of proteomic analyses were performed that were named according to the  
193 proteomic core facility performing the analysis as well as to the different conditions or mutants  
194 being analyzed, i.e. Grenoble facility (G1-6) for analysis of TOR constitutive RNAi, eIF4E mutants  
195 and WMV virus infection, Moulon (M1-3) for analysis of TOR RNAi inducible lines and Marseille  
196 (L3 and L4) for plants treated with AZD-8055 a TOR inhibitor (see Table I for details). The  
197 objective was to define a robust CBC core protein set from various analysis procedures. Different  
198 conditions potentially affecting CBC composition were used, each set including a control  
199 experiment based either on the Arabidopsis Col-0 ecotype or the Landsberg *erecta* ecotype (M1-  
200 M3). In experiments G1-4 a control where proteins were captured on Sepharose-4B without  
201 attached cap-analog was performed to evaluate non-specific binding. In experiments L3 and L4,  
202 proteins extracts were preincubated with Sepharose-4B. Between 86 to 997 proteins were identified

203 per experiment (Table I, Supplementary Table 1). For the experiments L3 and L4, the  
204 polyacrylamide electrophoresis gel was cut in ten slices which were analyzed separately. Specific  
205 proteins lists were then assembled to generate the total list of proteins in which duplicates were  
206 removed.. The majority of proteins were identified in only one or two proteomic analyses  
207 consistent with the idea that the composition of the CBC is dynamic by nature and that it can be  
208 influenced by experimental context and growth conditions, but also by the treatment of mass  
209 spectrometry data and instrument performance (Supplementary Table 1 to 10). We first performed  
210 a comparison of all lists of proteins found in control CBC experiments by defining their  
211 intersections to identify common components.

212 We thus established a core set of nine common proteins identified in all proteomic analyses (Table  
213 II, Figure 1). Seven out of these nine proteins were previously identified in a study of the  
214 composition of the CBC in Arabidopsis cell lines (Bush et al., 2009). These proteins represent  
215 canonical components of the CBC including eIF4E, eIF(iso)4E, eIF(iso)4G and nuclear CBP20  
216 and CBP80 (Castellano and Merchante, 2020). Another conserved protein is the RNS2 RNase  
217 (At2g39780) which has been shown to be involved in rRNA recycling and whose mutation results  
218 in reduced TOR activity (Kazibwe et al., 2020). A protein containing a GDSL-motif lipase  
219 (At1g29670) which interacts with SCE1 and Sumo, both of which interact with eIF3G, according  
220 to the Biogrid database (<https://thebiogrid.org/>) was also systematically identified. Almost all  
221 experiments, except the AZD-8055 control analysis, identified the beta subunit homolog potassium  
222 channel (At1g04690) which interacts with TAP46, a component of the PP2A phosphatase complex  
223 that is a target of the TOR kinase (van Leene et al., 2019; and reviewed in Ingargiola et al, 2020).  
224 The canonical eIF4G factor was often detected but less robustly than eIF(iso)4Gs, which could  
225 reflect a weaker association with eIF4E. Nitrate reductase isoforms (NIA1 At1g77760; NIA2  
226 At1g37130) were identified in several experiments and interact with the eIF2B-delta initiation  
227 factor that was also found to interact with the TORC1 complex (Figure 1; van Leene et al. 2019).  
228 The CERES protein (At4g23840), described as an eIF4E interacting protein (Toribio et al., 2019),  
229 was found in CBCs purified from hydroponics cultures (L4) but not after AZD-8055 treatment.  
230 In Brassicaceae, two recently duplicated genes can potentially code for eIF4EB (At1g29550) and  
231 eIF4EC (At1g29590) isoforms of eIF4E (Patrick and Browning, 2012). However, those proteins  
232 were not detected in our experiments. This confirms previous observations that eIF4EC appears  
233 unexpressed and that eIF4EB is expressed at low level (Patrick et al, 2014). The different subunits  
234 of eIF3E (eIF3a, eIF3c, eIF3e, eIF3f, eIF3h) were also frequently identified but at a lower  
235 frequency than core components.

236 Several different RNA helicases and RNA-binding proteins were identified in association with the  
237 CBC (see Tables II and III). Among them the AGO1 (At1g48410) protein was identified in almost  
238 all cases where TOR was inhibited either by silencing or by addition of AZD-8055 as well as in  
239 WMV infected plants (4 out of 5 experiments, see discussion below). The AGO2 (At1g31280)  
240 protein was also identified in some experiments after TOR inhibition (L3). GRP7 (At2g21660) and  
241 GRP8 (At4g39260) proteins are also present in most experiments, they were previously associated  
242 with the CBC and their role in RNA metabolism has been established (Steffen et al, 2019).

243

#### 244 **The Arabidopsis cap-binding complex in absence of eIF4E.**

245 We performed an analysis of the Arabidopsis CBC in the absence of eIF4E. The Salk-145583  
246 mutant line contains a T-DNA inserted in the first intron of the eIF4E gene (At4g18040). The lack  
247 of eIF4E in this mutant was previously characterized by western blot analysis (Bastet et al, 2018).  
248 Cap dependent translation in this mutant line is thought to rely mostly, if not entirely, on  
249 eIF(iso)4E, since *ejf4e/eIf(iso)4e* double mutants are not viable (Patrick et al, 2014; Callot and Gallois,  
250 2014) ruling out a substantial contribution of eIF4EB and eIF4EC. The eIF4E KO line exhibits a  
251 slow growth phenotype with a delay in flowering (Bastet et al, 2018). Polysome analysis reveal a  
252 lower accumulation of polysomes over monosomes compared to WT suggesting a global defect in  
253 translation (Figure 2). The absence of eIF4E was further confirmed in the proteomic analysis where  
254 it could not be detected in the mutant line (experiment G2), while it was well represented in all  
255 other conditions. eIF4E is thought to form a specific complex with eIF4G (At3g60240). Indeed,  
256 eIF4G was not detected in the eIF4E mutant line supporting the idea that heterologous  
257 eIF(iso)4E/eIF4G complex formation does not occur *in vivo*. In support of this, Patrick and  
258 Browning (2014) mention that plants with only eIF(iso)4E and eIF4G are not viable and Patrick  
259 et al, (2018) reported that eIF4G was also absent in the CBC of another eIF4E mutant line.  
260 Remarkably, AGO1 and NIA1 are still detected in the eIF4E mutant CBC (experiment G2),  
261 suggesting that they can associate with the eIF(iso)4E-dependent CBC.

262

#### 263 **Cap-binding complex modulation during TOR inhibition.**

264 Similarly, to the mammalian and yeast TOR pathways, inhibition of the plant TOR repress  
265 translation (Deprost et al, 2007). However, the molecular aspects of this repression are not fully  
266 understood. For example, functional equivalents of the mammalian 4E-BPs are still elusive in  
267 plants. Therefore, CBC analysis during TOR inhibition could reveal mediators of translational  
268 repression. To obtain a common picture of the effects of TOR inhibition, we analyzed the CBC in



269 three different conditions: constitutive RNAi (experiment G3) ethanol inducible RNAi  
270 (experiments M2 and 3), and treatment with AZD-8055 (experiment L3).

271 AGO1 is one of the proteins that is consistently detected in the CBC during different conditions  
272 of TOR inhibition. AGO1 is responsible of the mRNA cleavage activity of the RNA induced  
273 silencing complex (RISC) guided by different classes of small RNA (Song et al, 2019).  
274 Independently of RNA cleavage, RNA silencing has as strong effect on mRNA translation that is  
275 not completely understood (Brodersen et al, 2008; Lanet et al, 2009; Song et al, 2019). AGO1 has  
276 been associated with translating polysomes in plants (Lanet et al, 2009) and in other organisms,  
277 such as mammals and insects, miRNA and the RISC complex are known to interfere with the  
278 translation initiation step, although the targets and mechanism of action are still controversial  
279 (Jonas et al, 2015). The VARICOSE (VCS, At3g13300) WD-40 containing protein, a partner of  
280 the plant decapping complex, was also identified in the CBC after TOR inhibition (either by  
281 inducible silencing, M2 and M3, or after inhibition by AZD-8055, L3). The decapping complex  
282 removes the cap from the 5' end of mRNAs and is involved in eukaryotic mRNA decay and is  
283 composed of Decapping 1 (DCP1), Decapping 2 (DCP2) and VCS. Moreover, VCS can be  
284 phosphorylated by SnRK2 kinases (Soma et al. 2017; Kawa et al. 2020) which also inhibit TOR  
285 activity by phosphorylating RAPTOR (Wang et al. 2018) and controlling SnRK1 activity (Belda-  
286 Palazon et al. 2020). This could indicate a coordinated action of SnRK kinases on both the function  
287 of TOR and the stability of mRNAs. VCS was also found to be involved in the regulation of  
288 miRNA accumulation, which could suggest that VCS and AGO1 are TOR-dependent interactors  
289 of the CBC (Motomura et al. 2012).

290

### 291 **Potential plant 4E-BPs**

292 4E-BPs are involved in TOR mediated translational repression in mammals, but the plants analogs  
293 are still unknown. We therefore attempted to use our set of proteins to short-list potential plant  
294 4E-BPs. We started from the known 4E-BP motif (Gosselin et al, 2013) [HRKQ]-x-x-Y-x-[RH]-  
295 x-[FAVLIM]-L-[MLWIFY] that we slightly modified to better match Arabidopsis 4G and (iso)4G  
296 in [HRKQE]-x-x-[YRK]-x-[RHST]-x-[FAVLIME]- [LQE]-[MLWFYI]. A search of the whole  
297 Arabidopsis proteome provided 2598 hits. These were then compared to our complete set of  
298 proteins co-purified with the CBC providing 69 candidates (Table III). This list includes the CBE1  
299 protein whose absence was previously shown to delay flowering and derepress cell-cycle related  
300 genes, a likely TOR output (Patrick et al, 2018). This supports the fact that the short-list contains  
301 new potential translational regulators linked to the plant TOR pathway, which would need further  
302 studies to establish their roles in regulating eIF4E-dependent translation initiation.



304

### 305 **Potyviral proteins interacts with the CBC**

306 Plant potyviruses form a large family of RNA viruses. Their genome bears a 5' Viral Protein  
307 Genome linked (VPg known to interact with eIF4E and eIF(iso)4E proteins for promotion of viral  
308 infection (Robaglia and Caranta, 2006)). Depending on the virus species, eIF4E, eIF(iso)4E or  
309 both can be captured by the VPg. To examine whether viral infection affect CBC composition and  
310 if other viral proteins besides VPg (or its precursor the Nia protease) could directly or indirectly  
311 bind the CBC, we infected young Arabidopsis plants with Watermelon Mosaic Virus (WMV), a  
312 potyvirus using both eIF4E and eIF(iso)4E (Bastet et al, 2018) prior to CBC purification and  
313 analysis. Besides VPg-pro, we identified the multifunctional protein Hc-Pro, the viral coat protein,  
314 the viral polymerase Nib and the Cylindrical inclusion protein (CI). CI, HC-pro and VPg-pro were  
315 previously found to form a complex (Roudet-Tavert. et al, 2007, 2012; Zilian et al, 2011). Hc-Pro  
316 is a potyvirus specific multifunctional protein with multiple roles in virus/host interaction. One of  
317 its cellular functions is to suppress antiviral RNA silencing, although its precise molecular action is  
318 not fully understood. As discussed above, RNA silencing is associated with translational repression  
319 that likely involve AGO1, the main component of the RNA induced silencing complex. Hc-Pro  
320 has been shown to interact with AGO1 (Ivanov et al, 2016), which, as discussed above, is recruited  
321 to the CBC in conditions of TOR inhibition, that are known to strongly repress WMV potyvirus  
322 accumulation (Ouibrahim et al, 2015). Overall, this suggest that AGO1, guided by antiviral siRNA,  
323 is involved in translational repression of the viral genomic RNA and that Hc-Pro may counteract  
324 this mechanism during normal infections. When TOR is inhibited the resulting over-recruitment  
325 of AGO1 to the CBC to drive general translational repression would also override the action of  
326 Hc-Pro, leading to virus elimination by RNA silencing. Interestingly, the Potato virus A HC-pro  
327 component, a viral suppressor of RNA silencing, induces the formation of RNA granules  
328 containing the ribosomal protein P0 (also identified as a TOR target, Dobrenel et al. 2016), AGO1,  
329 VCS and eIF(iso)4E, which are involved in the stimulation of PVA translation (Hafrén et al. 2015).  
330 This suggests that a large protein complex containing CBC-interacting components like eIF(iso)4E,  
331 AGO1 and VCS could be formed upon TOR inhibition and/or viral infection.

332

### 333 **Conclusions**

334 In this work we analyze the data from 11 deep proteomic analysis of Arabidopsis CBC performed  
335 under different conditions. Most proteins were detected only in single treatment and with minimal  
336 peptides representation, raising caution about their physiological relevance in association with the  
337 CBC. However, a subset of proteins are reproducibly and highly represented in several

338 experiments, and among them known components of the CBC such as translation initiation factors  
339 of the eIF4E, eIF4G and eIF3 families, validating the global approach. We also confirm the  
340 association of several proteins to the CBC that were identified by Bush and Doonan (2009) or  
341 subsequently (Patrick et al, 2018; Toribio et al. 2019). This wide analysis also highlights new  
342 potential links between the CBC and mRNA metabolic pathways such as RNA silencing and the  
343 TOR pathway that could be tested experimentally. In contrast, the LARP1 protein, an established  
344 translational regulator presumed to be associated to the cap (Scarpin et al, 2020), is only found in  
345 the subset of experiments L3 and L4, which represent the deepest analysis in our set. This may  
346 indicate that if LARP1 binds the CBC, which has not been demonstrated in plants, then its affinity  
347 might be too weak to for retention during the purification procedure. A new finding is the  
348 association of AGO1 to the plant CBC when TOR activity is repressed. Following TOR inhibition,  
349 AGO1 may adhere more voraciously to the mRNA cap or to eIF4E, orientating RNA silencing  
350 from specific RNA repression in association with diverse small RNA guides towards global  
351 translational repression. From a TOR centered view, this would be an energetically favorable  
352 situation. Whatever the exact mechanism that links TOR dependent translational repression and  
353 RNA silencing, it is remarkable that another component of RNA silencing, the AGO1 associated  
354 SGS3 double stranded RNA binding protein also interacts with the TOR complex (van Leene et  
355 al 2019).

356 The activity of many proteins acting at the CBC, like in all dynamic macromolecular complexes,  
357 are likely to be modulated by post-translational modifications. Indeed, several plant translation  
358 initiation factors are known to be phosphorylated in response to changing physiological conditions  
359 (Browning and Bailey-Serres, 2015). We anticipate that the data made available in this work will  
360 facilitate the systematic study of the central role of translational regulations in plants.

361  
362 **Acknowledgements:** This work was partly funded by the ANR program TranslaTOR (ANR-11-  
363 BSV6-0010) to AM, CM and CR and LabEx Saclay Plant Sciences-SPS (ANR-10- LABX-0040-  
364 SPS) to AM and CM. We thank the proteomic platforms Edyp-Grenoble, PAPPISO-Moulon and  
365 IMM-Marseille for their help in experiment design and data analysis and Dr. Benjamin Field for  
366 corrections on the manuscript. The proteomic experiments performed in Grenoble were partially  
367 supported by Agence Nationale de la Recherche under projects ProFI (Proteomics French  
368 Infrastructure, ANR-10-INBS-08) and GRAL, a program from the Chemistry Biology Health  
369 (CBH) Graduate School of University Grenoble Alpes (ANR-17-EURE-0003).

370  
371

372 **Authors contribution:** AM, LO, CR, RL, MA, YC, MB, CL performed experiments, AM, LO,  
373 CL, CC, CM, CR designed experiments and analyzed the data, CM and CR wrote the manuscript.

374

375

376

377

378

## 379 **References**

380

381

382 Bastet A, Lederer B, Giovinazzo N, Arnoux X, German-Retana S, Reinbold C, Brault V, Garcia  
383 D, Djennane S, Gersch S, Lemaire O, Robaglia C, Gallois JL. Trans-species synthetic gene design  
384 allows resistance pyramiding and broad-spectrum engineering of virus resistance in plants. *Plant*  
385 *Biotechnol J*. 2018 Mar 5;16(9):1569–81. doi: 10.1111/pbi.12896. Epub ahead of print. PMID:  
386 29504210; PMCID: PMC6097130.

387

388 Belda-Palazón B, Adamo M, Valerio C, Ferreira LJ, Confraria A, Reis-Barata D, Rodrigues A,  
389 Meyer C, Rodriguez PL, Baena-González E. A dual function of SnRK2 kinases in the regulation  
390 of SnRK1 and plant growth. *Nat Plants*. 2020 Nov;6(11):1345-1353. doi: 10.1038/s41477-020-  
391 00778-w. Epub 2020 Oct 19. PMID: 33077877.

392

393 Brodersen P, Sakvarelidze-Achard L, Bruun-Rasmussen M, Dunoyer P, Yamamoto YY, Sieburth  
394 L, Voinnet O. Widespread translational inhibition by plant miRNAs and siRNAs. *Science*. 2008  
395 May 30;320(5880):1185-90. doi: 10.1126/science.1159151. Epub 2008 May 15. PMID: 18483398.

396

397 Browning KS, Bailey-Serres J. Mechanism of cytoplasmic mRNA translation. *Arabidopsis Book*.  
398 2015 Apr 24;13:e0176. doi: 10.1199/tab.0176. PMID: 26019692; PMCID: PMC4441251.

399

400 Bush MS, Hutchins AP, Jones AM, Naldrett MJ, Jarmolowski A, Lloyd CW, Doonan JH. Selective  
401 recruitment of proteins to 5' cap complexes during the growth cycle in *Arabidopsis*. *Plant J*. 2009  
402 Aug;59(3):400-12. doi: 10.1111/j.1365-313X.2009.03882.x. Epub 2009 Mar 30. PMID: 19453450.

403

404 Callot C and Gallois JL (2014) Pyramiding resistances based on translation initiation factors  
405 in *Arabidopsis* is impaired by male gametophyte lethality, *Plant Signaling &*  
406 *Behavior*, 9:2, DOI: [10.4161/psb.27940](https://doi.org/10.4161/psb.27940)

407

408 Castellano MM, Merchante C. Peculiarities of the regulation of translation initiation in plants. *Curr*  
409 *Opin Plant Biol*. 2021 Jun 26;63:102073. doi: 10.1016/j.pbi.2021.102073. Epub ahead of print.  
410 PMID: 34186463.

411

412 Condon KJ, Sabatini DM. Nutrient regulation of mTORC1 at a glance. *J Cell Sci*. 2019 Nov  
413 13;132(21):jcs222570. doi: 10.1242/jcs.222570. PMID: 31722960; PMCID: PMC6857595.

414

415 Deprost D, Yao L, Sormani R, Moreau M, Leterreux G, Nicolai M, Bedu M, Robaglia C, Meyer C.  
416 The *Arabidopsis* TOR kinase links plant growth, yield, stress resistance and mRNA translation.  
417 *EMBO Rep*. 2007 Sep;8(9):864-70. doi: 10.1038/sj.embor.7401043. Epub 2007 Aug 3. PMID:  
418 17721444; PMCID: PMC1973950.

419

420 Dobrenel T, Mancera-Martínez E, Forzani C, Azzopardi M, Davanture M, Moreau M,  
421 Schepetilnikov M, Chicher J, Langella O, Zivy M, Robaglia C, Ryabova LA, Hanson J, Meyer C.

- 422 The Arabidopsis TOR Kinase Specifically Regulates the Expression of Nuclear Genes Coding for  
423 Plastidic Ribosomal Proteins and the Phosphorylation of the Cytosolic Ribosomal Protein S6.  
424 *Front Plant Sci.* 2016 Nov 7;7:1611. doi: 10.3389/fpls.2016.01611. PMID: 27877176; PMCID:  
425 PMC5100631.
- 426
- 427 Eskelin K, Hafrén A, Rantalainen KI, Mäkinen K. Potyviral VPg enhances viral RNA Translation  
428 and inhibits reporter mRNA translation in planta. *J Virol.* 2011 Sep;85(17):9210-21. doi:  
429 10.1128/JVI.00052-11. Epub 2011 Jun 22. PMID: 21697470; PMCID: PMC3165822.
- 430
- 431 Gosselin P, Martineau Y, Morales J, Czjzek M, Glippa V, Gauffeny I, Morin E, Le Corguillé G,  
432 Pyronnet S, Cormier P, Cosson B. Tracking a refined eIF4E-binding motif reveals Angel1 as a new  
433 partner of eIF4E. *Nucleic Acids Res.* 2013 Sep;41(16):7783-92. doi: 10.1093/nar/gkt569. Epub  
434 2013 Jun 27. PMID: 23814182; PMCID: PMC3763552.
- 435
- 436 Hafrén A, Löhmus A, Mäkinen K. Formation of Potato Virus A-Induced RNA Granules and  
437 Viral Translation Are Interrelated Processes Required for Optimal Virus Accumulation. *PLoS*  
438 *Pathog.* 2015 Dec 7;11(12):e1005314. doi: 10.1371/journal.ppat.1005314.
- 439
- 440 Hashimoto M, Neriya Y, Keima T, Iwabuchi N, Koinuma H, Hagiwara-Komoda Y, Ishikawa K,  
441 Himeno M, Maejima K, Yamaji Y, Namba S. EXA1, a GYF domain protein, is responsible for  
442 loss-of-susceptibility to plantago asiatica mosaic virus in Arabidopsis thaliana. *Plant J.* 2016  
443 Oct;88(1):120-131. doi: 10.1111/tpj.13265. Epub 2016 Sep 19. PMID: 27402258.
- 444
- 445 Ingargiola C, Turqueto Duarte G, Robaglia C, Leprince AS, Meyer C. The Plant Target of  
446 Rapamycin: A Conduc TOR of Nutrition and Metabolism in Photosynthetic Organisms. *Genes*  
447 (Basel). 2020 Oct 29;11(11):1285. doi: 10.3390/genes11111285. PMID: 33138108; PMCID:  
448 PMC7694126.
- 449
- 450 Ivanov KI, Eskelin K, Bašić M, De S, Löhmus A, Varjosalo M, Mäkinen K. Molecular insights into  
451 the function of the viral RNA silencing suppressor HCPro. *Plant J.* 2016 Jan;85(1):30-45. doi:  
452 10.1111/tpj.13088. PMID: 26611351.
- 453
- 454 Jackson RJ, Hellen CU, Pestova TV. The mechanism of eukaryotic translation initiation and  
455 principles of its regulation. *Nat Rev Mol Cell Biol.* 2010 Feb;11(2):113-27. doi: 10.1038/nrm2838.  
456 PMID: 20094052; PMCID: PMC4461372.
- 457
- 458 Jonas S, Izaurralde E. Towards a molecular understanding of microRNA-mediated gene silencing.  
459 *Nat Rev Genet.* 2015 Jul;16(7):421-33. doi: 10.1038/nrg3965. Epub 2015 Jun 16. PMID: 26077373.
- 460
- 461 Kawa D, Meyer AJ, Dekker HL, Abd-El-Halim AM, Gevaert K, Van De Slijke E, Maszkowska  
462 J, Bucholc M, Dobrowolska G, De Jaeger G, Schuurink RC, Haring MA, Testerink C. SnRK2  
463 Protein Kinases and mRNA Decapping Machinery Control Root Development and Response to  
464 Salt. *Plant Physiol* 2020 Jan;182(1):361-377. doi: 10.1104/pp.19.00818.
- 465
- 466 Kazibwe Z, Soto-Burgos J, MacIntosh GC, Bassham DC. TOR mediates the autophagy response  
467 to altered nucleotide homeostasis in an RNase mutant. *J Exp Bot.* 2020 Dec 31;71(22):6907-6920.  
468 doi: 10.1093/jxb/eraa410. PMID: 32905584.
- 469
- 470 Khan MA, Miyoshi H, Gallie DR, Goss DJ. Potyvirus genome-linked protein, VPg, directly affects  
471 wheat germ in vitro translation: interactions with translation initiation factors eIF4F and eIFiso4F.

- 472 J Biol Chem. 2008 Jan 18;283(3):1340-9. doi: 10.1074/jbc.M703356200. Epub 2007 Nov 28.  
473 PMID: 18045881.  
474
- 475 Kumar P, Hellen CU, Pestova TV. Toward the mechanism of eIF4F-mediated ribosomal  
476 attachment to mammalian capped mRNAs. *Genes Dev.* 2016 Jul 1;30(13):1573-88. doi:  
477 10.1101/gad.282418.116. PMID: 27401559; PMCID: PMC4949329.  
478
- 479 Lahr RM, Fonseca BD, Ciotti GE, Al-Ashtal HA, Jia JJ, Niklaus MR, Blagden SP, Alain T, Berman AJ.  
480 La-related protein 1 (LARP1) binds the mRNA cap, blocking eIF4F assembly on TOP mRNAs. *Elife.*  
481 2017 Apr 7;6:e24146. doi: 10.7554/eLife.24146. PMID: 28379136; PMCID: PMC5419741.  
482
- 483 Lanet E, Delannoy E, Sormani R, Floris M, Brodersen P, Créte P, Voinnet O, Robaglia C.  
484 Biochemical evidence for translational repression by Arabidopsis microRNAs. *Plant Cell.* 2009  
485 Jun;21(6):1762-8. doi: 10.1105/tpc.108.063412. Epub 2009 Jun 16. PMID: 19531599; PMCID:  
486 PMC2714937.  
487
- 488 Lecampion C, Floris M, Fantino JR, Robaglia C, Laloi C. An Easy Method for Plant Polysome  
489 Profiling. *J Vis Exp.* 2016 Aug 28;(114):54231. doi: 10.3791/54231. PMID: 27684295; PMCID:  
490 PMC5091964.  
491
- 492 Mamane Y, Petroulakis E, LeBacquer O, Sonenberg N. mTOR, translation initiation and cancer.  
493 *Oncogene.* 2006 Oct 16;25(48):6416-22. doi: 10.1038/sj.onc.1209888. PMID: 17041626.  
494
- 495 Merret R, Descombin J, Juan YT, Favory JJ, Carpentier MC, Chaparro C, Charng YY, Deragon JM,  
496 Bousquet-Antonelli C. XRN4 and LARP1 are required for a heat-triggered mRNA decay pathway  
497 involved in plant acclimation and survival during thermal stress. *Cell Rep.* 2013 Dec 12;5(5):1279-93.  
498 doi: 10.1016/j.celrep.2013.11.019. PMID: 24332370.  
499
- 500 Mir MA, Panganiban AT. A protein that replaces the entire cellular eIF4F complex. *EMBO J.* 2008  
501 Dec 3;27(23):3129-39. doi: 10.1038/emboj.2008.228. Epub 2008 Oct 30. PMID: 18971945;  
502 PMCID: PMC2599872.  
503
- 504 Montané MH, Menand B. ATP-competitive mTOR kinase inhibitors delay plant growth by  
505 triggering early differentiation of meristematic cells but no developmental patterning change. *J Exp*  
506 *Bot.* 2013 Nov;64(14):4361-74. doi: 10.1093/jxb/ert242. Epub 2013 Aug 20. PMID: 23963679;  
507 PMCID: PMC3808319.  
508
- 509 Motomura K, Le QTN, Kumakura N, Fukaya T, Takeda A, Watanabe Y. The role of decapping  
510 proteins in the miRNA accumulation in Arabidopsis thaliana. *RNA Biology* 9:5, 644-652; May  
511 2012.  
512
- 513 Nieto C, Morales M, Orjeda G, Clepet C, Monfort A, Sturbois B, Puigdomènech P, Pitrat M,  
514 Caboche M, Dogimont C, Garcia-Mas J, Aranda MA, Bendahmane A. An eIF4E allele confers  
515 resistance to an uncapped and non-polyadenylated RNA virus in melon. *Plant J.* 2006  
516 Nov;48(3):452-62. doi: 10.1111/j.1365-313X.2006.02885.x. Epub 2006 Oct 5. PMID: 17026540.  
517
- 518 Ouibrahim L, Rubio AG, Moretti A, Montané MH, Menand B, Meyer C, Robaglia C, Caranta C.  
519 Potyviruses differ in their requirement for TOR signalling. *J Gen Virol.* 2015 Sep;96(9):2898-2903.  
520 doi: 10.1099/vir.0.000186. Epub 2015 May 15. PMID: 25979731.  
521

- 522 Patrick RM, Browning KS. The eIF4F and eIFiso4F Complexes of Plants: An Evolutionary  
523 Perspective. *Comp Funct Genomics*. 2012;2012:287814. doi: 10.1155/2012/287814. Epub 2012  
524 May 7. PMID: 22611336; PMCID: PMC3352336.  
525
- 526 Patrick RM, Lee JCH, Teetsel JRJ, Yang SH, Choy GS, Browning KS. Discovery and  
527 characterization of conserved binding of eIF4E 1 (CBE1), a eukaryotic translation initiation factor  
528 4E-binding plant protein. *J Biol Chem*. 2018 Nov 2;293(44):17240-17247. doi:  
529 10.1074/jbc.RA118.003945. Epub 2018 Sep 13. PMID: 30213859; PMCID: PMC6222093.  
530
- 531 Patrick RM, Mayberry LK, Choy G, Woodard LE, Liu JS, White A, Mullen RA, Tanavin TM, Latz  
532 CA, Browning KS. Two Arabidopsis loci encode novel eukaryotic initiation factor 4E isoforms  
533 that are functionally distinct from the conserved plant eukaryotic initiation factor 4E. *Plant Physiol*.  
534 2014 Apr;164(4):1820-30. doi: 10.1104/pp.113.227785. Epub 2014 Feb 5. PMID: 24501003;  
535 PMCID: PMC3982745.  
536
- 537 Perez-Riverol Y, Csordas A, Bai J, Bernal-Llinares M, Hewapathirana S, Kundu DJ, Inuganti A,  
538 Griss J, Mayer G, Eisenacher M, Pérez E, Uszkoreit J, Pfeuffer J, Sachsenberg T, Yilmaz S, Tiwary  
539 S, Cox J, Audain E, Walzer M, Jarnuczak AF, Ternent T, Brazma A, Vizcaíno JA (2019). The  
540 PRIDE database and related tools and resources in 2019: improving support for quantification  
541 data. *Nucleic Acids Res* 47(D1):D442-D450 (PubMed ID: 30395289).  
542
- 543 Poulicard N, Pacios LF, Gallois JL, Piñero D, García-Arenal F. Human Management of a Wild  
544 Plant Modulates the Evolutionary Dynamics of a Gene Determining Recessive Resistance to Virus  
545 Infection. *PLoS Genet*. 2016 Aug 4;12(8):e1006214. doi: 10.1371/journal.pgen.1006214. PMID:  
546 27490800; PMCID: PMC4973933.  
547
- 548 Robaglia C, Caranta C. Translation initiation factors: a weak link in plant RNA virus infection.  
549 *Trends Plant Sci*. 2006 Jan;11(1):40-5. doi: 10.1016/j.tplants.2005.11.004. Epub 2005 Dec 15.  
550 PMID: 16343979.  
551
- 552 Roudet-Tavert G, Michon T, Walter J, Delaunay T, Redondo E, Le Gall O. Central domain of a  
553 potyvirus VPg is involved in the interaction with the host translation initiation factor eIF4E and  
554 the viral protein HcPro. *J Gen Virol*. 2007 Mar;88(Pt 3):1029-1033. doi: 10.1099/vir.0.82501-0.  
555 PMID: 17325377.  
556
- 557 Roudet-Tavert G, Abdul-Razzak A, Doublet B, Walter J, Delaunay T, German-Retana S, Michon  
558 T, Le Gall O, Candresse T. The C terminus of lettuce mosaic potyvirus cylindrical inclusion helicase  
559 interacts with the viral VPg and with lettuce translation eukaryotic initiation factor 4E. *J Gen Virol*.  
560 2012 Jan;93(Pt 1):184-193. doi: 10.1099/vir.0.035881-0. Epub 2011 Sep 14. PMID: 21918009.  
561
- 562 Scarpin MR, Leiboff S, Brunkard JO. Parallel global profiling of plant TOR dynamics reveals a  
563 conserved role for LARP1 in translation. *Elife* 2020 Oct 15;9 e58795. doi: 10.7554/eLife.58795.  
564  
565
- 566 Shah P, Ding Y, Niemczyk M, Kudla G, Plotkin JB. Rate-limiting steps in yeast protein translation.  
567 *Cell*. 2013 Jun 20;153(7):1589-601. doi: 10.1016/j.cell.2013.05.049. PMID: 23791185; PMCID:  
568 PMC3694300.  
569
- 570 Simon AE, Miller WA. 3' cap-independent translation enhancers of plant viruses. *Annu Rev*  
571 *Microbiol*. 2013;67:21-42. doi: 10.1146/annurev-micro-092412-155609. Epub 2013 May 13.  
572 PMID: 23682606; PMCID: PMC4034384.



573  
574 Soma F, Mogami J, Yoshida T, Abekura M, Takahashi F, Kidokoro S, Mizoi J, Shinozaki K,  
575 Yamaguchi-Shinozaki K. ABA-unresponsive SnRK2 protein kinases regulate mRNA decay under  
576 osmotic stress in plants. *Nat Plants*. 2017 Jan 6;3:16204. doi: 10.1038/nplants.2016.204. PMID:  
577 28059081.  
578  
579 Sonenberg N, Rupperecht KM, Hecht SM, Shatkin AJ. Eukaryotic mRNA cap binding protein:  
580 purification by affinity chromatography on sepharose-coupled m7GDP. *Proc Natl Acad Sci U S*  
581 *A*. 1979 Sep;76(9):4345-9. doi: 10.1073/pnas.76.9.4345. PMID: 291969; PMCID: PMC411571.  
582  
583 Song X, Li Y, Cao X, Qi Y. MicroRNAs and Their Regulatory Roles in Plant-Environment  
584 Interactions. *Annu Rev Plant Biol*. 2019 Apr 29;70:489-525. doi: 10.1146/annurev-arplant-050718-  
585 100334. Epub 2019 Mar 8. PMID: 30848930.  
586  
587 Steffen A, Elgner M, Staiger D. Regulation of Flowering Time by the RNA-Binding Proteins  
588 AtGRP7 and AtGRP8. *Plant Cell Physiol*. 2019 Sep 1;60(9):2040-2050. doi: 10.1093/pcp/pcz124.  
589 PMID: 31241165.  
590  
591 Toribio R, Muñoz A, Castro-Sanz AB, Merchante C, Castellano MM. A novel eIF4E-interacting  
592 protein that forms non-canonical translation initiation complexes. *Nat Plants*. 2019  
593 Dec;5(12):1283-1296. doi: 10.1038/s41477-019-0553-2. Epub 2019 Dec 9. PMID: 31819221;  
594 PMCID: PMC6914366.  
595  
596 Van Leene J, Han C, Gadeyne A, Eeckhout D, Matthijs C, Cannoot B, De Winne N, Persiau G,  
597 Van De Slijke E, Van de Cotte B, Stes E, Van Bel M, Storme V, Impens F, Gevaert K, Vandepoele  
598 K, De Smet I, De Jaeger G. Capturing the phosphorylation and protein interaction landscape of  
599 the plant TOR kinase. *Nat Plants*. 2019 Mar;5(3):316-327. doi: 10.1038/s41477-019-0378-z. Epub  
600 2019 Mar 4. PMID: 30833711.  
601  
602 Wang P, Zhao Y, Li Z, Hsu CC, Liu X, Fu L, Hou YJ, Du Y, Xie S, Zhang C, Gao J, Cao M,  
603 Huang X, Zhu Y, Tang K, Wang X, Tao WA, Xiong Y, Zhu JK. Reciprocal Regulation of the TOR  
604 Kinase and ABA Receptor Balances Plant Growth and Stress Response. *Mol Cell*. 2018 Jan  
605 4;69(1):100-112.e6. doi: 10.1016/j.molcel.2017.12.002. Epub 2017 Dec 28. PMID: 29290610;  
606 PMCID: PMC5772982.  
607  
608 Wu Z, Huang S, Zhang X, Wu D, Xia S, Li X. Regulation of plant immune receptor accumulation  
609 through translational repression by a glycine-tyrosine-phenylalanine (GYF) domain protein. *Elife*.  
610 2017 Mar 31;6:e23684. doi: 10.7554/eLife.23684. PMID: 28362261; PMCID: PMC5403212.  
611  
612 Zilian E, Maiss E. Detection of plum pox potyviral protein-protein interactions in planta using an  
613 optimized mRFP-based bimolecular fluorescence complementation system. *J Gen Virol*. 2011  
614 Dec;92(Pt 12):2711-2723. doi: 10.1099/vir.0.033811-0. Epub 2011 Aug 31. PMID: 21880839.  
615  
616

617

618 **Figure legends:**

619

620 **Figure 1:** Identification of core CBC and TOR-dependent components.

621 Spheres in blue and red (expected direct interaction with m7GTP, red lines) represent  
622 the core CBC found in all control experiments using control Arabidopsis Col-0  
623 plants. Blue donuts show proteins often but not always detected in the proteomic  
624 analyses of the CBC. Black spheres and lines represent interacting proteins identified  
625 in the Biogrid database

626 Blue cylinders represent the AGO1 and Varicose (VCS) proteins found in all cap-  
627 binding affinity purifications when TOR activity was inhibited (RNAi, AZD-8055  
628 treatment).

629

630 **Figure 2:** Polysome profiles of Col-0 and eIF4E KO seedlings. The area under the  
631 curves of monosomes and polysomes of each profile was integrated to give the graph  
632 shown to the right. Orange, polysomes; violet, monosomes.

633

634 **Figure 3:** WMV polyprotein specific peptides identified in the CBC (see  
635 Supplemental Data 6 and 7 for details).

636

637

638

## 639 Tables

640

| Name of experiment                               | Genotype/inhibitor         | Growth conditions           | Purification method                                                                                          | Total number of detected proteins | Platform      |
|--------------------------------------------------|----------------------------|-----------------------------|--------------------------------------------------------------------------------------------------------------|-----------------------------------|---------------|
| G1: Control eIF4E mutant TOR RNAi                | Col0                       | 8d seedlings liquid culture | m7GTP sepharose, gel separation. The gel was cut in two slices which were analyzed independently.            | 486                               | Edyp-Grenoble |
| G2: eIF4E mutant                                 | Col0 eIF4E-/-              | 8d seedlings liquid culture | m7GTP sepharose, gel separation. The gel was cut in two slices which were analyzed independently.            | 345                               | Edyp-Grenoble |
| G3: Constitutive TOR RNAi                        | Col0 TOR constitutive RNAi | 8d seedlings liquid culture | m7GTP sepharose, gel separation. The gel was cut in two slices which were analyzed independently.            | 190                               | Edyp-Grenoble |
| G4: Control unspecific binding                   | Col0                       | 8d seedlings liquid culture | Sepharose4B, gel separation. The gel was cut in two slices which were analyzed independently.                | 354                               | Edyp-Grenoble |
| G5 : Control WMV infection                       | Col0                       | 35d old plants, soil        | m7GTP sepharose                                                                                              | 165                               | Edyp-Grenoble |
| G6: WMV infection                                | Col0+WMV                   | 35d old plants, soil        | m7GTP sepharose                                                                                              | 111                               | Edyp-Grenoble |
| M1: Control TOR inducible RNAi                   | Le alca::GUS               | 8d seedlings liquid culture | m7GTP sepharose                                                                                              | 86                                | PAPPSO        |
| M2: TOR inducible RNAi 5.2 line                  | Le alca::TOR-IRNAI 1       | 8d seedlings liquid culture | m7GTP sepharose                                                                                              | 181                               | PAPPSO        |
| M3: TOR inducible RNAi 6.3 line                  | Le alca::TOR-IRNAI 2       | 8d seedlings liquid culture | m7GTP sepharose                                                                                              | 183                               | PAPPSO        |
| L3: AZD8055 treatment                            | Col0                       | 21d seedlings hydroponic    | Sepharose4B preadsorption, m7GTP sepharose. The gel was cut in ten slices which were analyzed independently. | 822                               | Marseille IMM |
| L4: Control DMSO treatment for AZD8055 treatment | Col0 + AZD8055             | 21d seedlings hydroponic    | Sepharose4B preadsorption, m7GTP sepharose. The gel was cut in ten slices which were analyzed independently. | 997                               | Marseille IMM |

641

642 **Table I:** Details of experimental procedures for proteomic analyses of the  
 643 Arabidopsis cap-binding complex. The total number of proteins detected in each  
 644 experiment in indicated.

645 Experimental data can be found in:

646 G1 to G4: supplemental data tables 2-5

647 G5 to G6: supplemental data tables 6-7

648 M1-3: supplemental data table 8

649 L3 to L4: supplemental data table 9-10

650

651

At5g44200 CBP20\_nuclear cap-binding protein  
 At5g35620 eIF(iso)4E\_LSP1  
 At4g22010 SKS4\_multi-copper oxidase type I  
 At2g24050 eIF (iso)4G2  
 At1g29670 GDSL-motif lipase  
 At5g57870 eIF (iso)4G1  
 At2g39780 RNS2\_ribonuclease 2  
 At2g13540 CBP80\_nuclear cap-binding protein  
 At4g18040 eIF4E1

At1g48410 AGO1\_Argonaute protein  
 At3g13300 Varicose\_WD-40 motif protein

652

653 **Table II** : Proteins of the core CBC present in all proteomic analyses.

654 Upper panel: Core CBC defined by proteomic analyses of the control Col-0 line.

655 Proteins in blue were not found in the CBC after TOR silencing.

656 Lower panel: proteins present in experiments after TOR RNA silencing or inhibition  
 657 with AZD-8055.

658

659

|          |                                                                        |           |                                                                                                                          |
|----------|------------------------------------------------------------------------|-----------|--------------------------------------------------------------------------------------------------------------------------|
| A2g05830 | eukaryotic translation initiation factor 2B family protein             | A1g36160  | ACC1__similar to acetyl-CoA carboxylase 2                                                                                |
| A1g62380 | ACQ2_ATACQ2__1-aminocyclopropane-1-carboxylate oxidase                 | A4g04570  | protein kinase family protein, contains Pfam domain PF00069: Protein kinase domain                                       |
| A5g09590 | mHSC70-2_HSC70-5__heat shock protein 70                                | A5g57870  | eukaryotic translation initiation factor 4F                                                                              |
| A4g37910 | MTHSC70-1__heat shock protein 70, mitochondrial, putative              | A1g76160  | SKS5__multi-copper oxidase type I                                                                                        |
| A1g09620 | similar to leucyl-tRNA synthetase, putative (InterPro:IPR002300)       | A5g69860  | LON_ARA_ARA__similar to Lon protease                                                                                     |
| A3g08530 | clathrin heavy chain, putative                                         | A5g58420  | 40S ribosomal protein S4                                                                                                 |
| A1g43170 | ARP1_RPL3A_EMB2207__60S ribosomal protein L3 (RPL3A)                   | A1g10760  | SEX1_GWD_GWD1_SOP_SOP1__starch excess protein                                                                            |
| A4g35850 | pentatricopeptide (PPR) repeat-containing protein                      | A5g07090  | 40S ribosomal protein S4 (RPS4B)                                                                                         |
| A1g77760 | NIA1_GNR1_NR1__nitrate reductase 1 (NR1)                               | A4g09040  | RNA recognition motif (RRM)-containing protein, low similarity to enhancer binding protein-1; EBP1                       |
| A5g20850 | glycoyl hydrolase family 3 protein                                     | A4g01290  | expressed protein                                                                                                        |
| A5g58290 | RPT3__26S proteasome AAA-ATPase subunit (RPT3)                         | A4g39830  | aconitate hydratase                                                                                                      |
| A3g63460 | EMB2221__WD-40 repeat family protein                                   | A5g65110  | ACX2_ATACX2__acyl-CoA oxidase (ACX2), identical to acyl-CoA oxidase (Arabidopsis thaliana) GI:3044212                    |
| A3g60240 | EIF4G_CUM2__MIF4G domain-containing protein                            | A1g53310  | ATPPC1__phosphoenolpyruvate carboxylase, putative                                                                        |
| A1g06950 | ATTIC10_TIC110                                                         | A3g63140  | mRNA-binding protein, putative, similar to mRNA binding protein precursor (GI:26453355) (Lycopersicon esculentum)        |
| A1g08520 | PDE166__magnesium-chelatase subunit chD                                | A2g17360  | 40S ribosomal protein S4 (RPS4A), contains ribosomal protein S4 signature from residues 8 to 22                          |
| A5g46580 | pentatricopeptide (PPR) repeat-containing protein                      | A1g62020  | coatomer protein complex, subunit alpha,                                                                                 |
| A4g30090 | vacuolar proton ATPase                                                 | A3g62530  | PBS lyase HEAT-like repeat-containing protein, contains Pfam profile: PF03130 PBS lyase HEAT-like repeat                 |
| A5g42020 | BIP__luminal binding protein 2 (BIP-2)                                 | A1g20060  | EMB1507__U5 small nuclear ribonucleoprotein helicase                                                                     |
| A5g65010 | ASN2__asparagine synthetase 2 (ASN2)                                   | A1g71810  | ABC1 family protein, contains Pfam domain, PF03109: ABC 1 family                                                         |
| A2g24050 | MIF4G domain-containing protein                                        | A1g14000  | protein kinase family protein / ankyrin repeat family protein, contains Pfam profiles: PF00069 protein kinase domain,    |
| A4g26970 | aconitate hydratase                                                    | A3g05530  | RPT5A_ATS6A2__26S proteasome AAA-ATPase subunit (RPT5a), identical to GB.AAF22525 GI:6652896 from (Arabidopsis thaliana) |
| A1g41830 | SKS6__multi-copper oxidase type I                                      | A1g76720  | eukaryotic translation initiation factor 2 family protein /                                                              |
| A4g11420 | EIF3A_eukaryotic translation initiation factor 3 subunit 10            | A2g37660  | expressed protein                                                                                                        |
| A3g02380 | 6-phosphogluconate dehydrogenase family protein                        | A3g56650  | thylakoid lumenal 20 kDa protein,                                                                                        |
| A5g56500 | similar to chaperonin                                                  | A2g21390  | coatomer protein complex, subunit alpha, putative, contains Pfam PF00400: WD domain                                      |
| A5g28540 | luminal binding protein 1 (BIP-1)                                      | A1g37130  | NIA2__nitrate reductase 2 (NR2)                                                                                          |
| A2g30210 | LAC3__laccase, putative                                                | A1g79990  | coatomer protein complex,                                                                                                |
| A3g22540 | cupin family protein, contains similarity to vicilin-expressed protein | A2g38040  | CAC3__acetyl co-enzyme A carboxylase carboxyltransferase alpha subunit                                                   |
| A1g47420 | STH__pH-B-type carbohydrate kinase                                     | A4g29810  | ATMKK2_MK1_MKK2__mitogen-activated protein kinase kinase (MAPKK)                                                         |
| A2g31390 | NIR1_ATHNIR_NIR__ferrodoxin-nitrite reductase                          | A1g27450  | APT1__adenine phosphoribosyltransferase 1                                                                                |
| A2g15620 |                                                                        | A1g03475  | LIN2__coproporphyrinogen III oxidase,                                                                                    |
|          |                                                                        | A3g46970  | ATPHS2_PHS2__Encodes a cytosolic alpha-glucan phosphorylase.                                                             |
|          |                                                                        | A3g11130  | clathrin heavy chain, putative, similar to Swiss-Prot:Q00610 clathrin heavy chain 1 (CLH-1) (Homo sapiens)               |
|          |                                                                        | A3g01780  | expressed protein, est hit,                                                                                              |
|          |                                                                        | A1g12840  | DET3__vacuolar ATP synthase subunit C (VATC)                                                                             |
|          |                                                                        | A4g10840  | kinesin light chain-related                                                                                              |
|          |                                                                        | A1Cg00750 | RPS11__30S chloroplast ribosomal protein S11                                                                             |
|          |                                                                        | A5g26280  | meprin and TRAF homology domain-containing protein                                                                       |

660

661 **Table III:** Subset of proteins from all the 11 experiments bearing the modified 4E-  
662 BP motif [HRKQE]-x-x-[YRK]-x-[RHST]-x-[FAVLIME]- [LQE]-[MLWFYI]

663

664

### 665 **Supplemental data legends**

666

667 **Supplemental data table 1:** Lists of the proteins which were identified in all the  
668 proteomic analyses of purified CBC. Experiments names correspond to the ones  
669 defined in Table I.

670

671 **Supplemental data tables 2-5 :** Proteomic data of CBCs purified from Col0  
672 (Table 2), eIF4E mutant (Table 3), TOR constitutive RNAi 35-7 line (Table 4), and  
673 Sepharose 4B control (Table 5, proteins identified from two gel slices for each  
674 conditions).

675

676 **Supplemental data tables 6-7 :** Proteomic data of CBCs purified from Col0  
677 (Table 6), and Col0 infected with Watermelon Mosaic Viruses (Table 7). Data from  
678 Sepharose4B binding proteins was extracted from Supplemental table 5.

679

680 **Supplemental data table 8:** Proteomic data of CBCs purified from ethanol  
681 induced alcA::Gus control, alcA::TOR RNAi 5.3, alcA::TOR RNAi6.3 lines.

682

683 **Supplemental data tables 9-10:** Proteomic data of CBCs purified from Col0  
684 seedlings treated with the TOR inhibitor AZD-8055 (Table 9, L3 ) and from  
685 control Col0 treated with DMSO for 15 min (Table 10, L4).

686

687

688

689

690

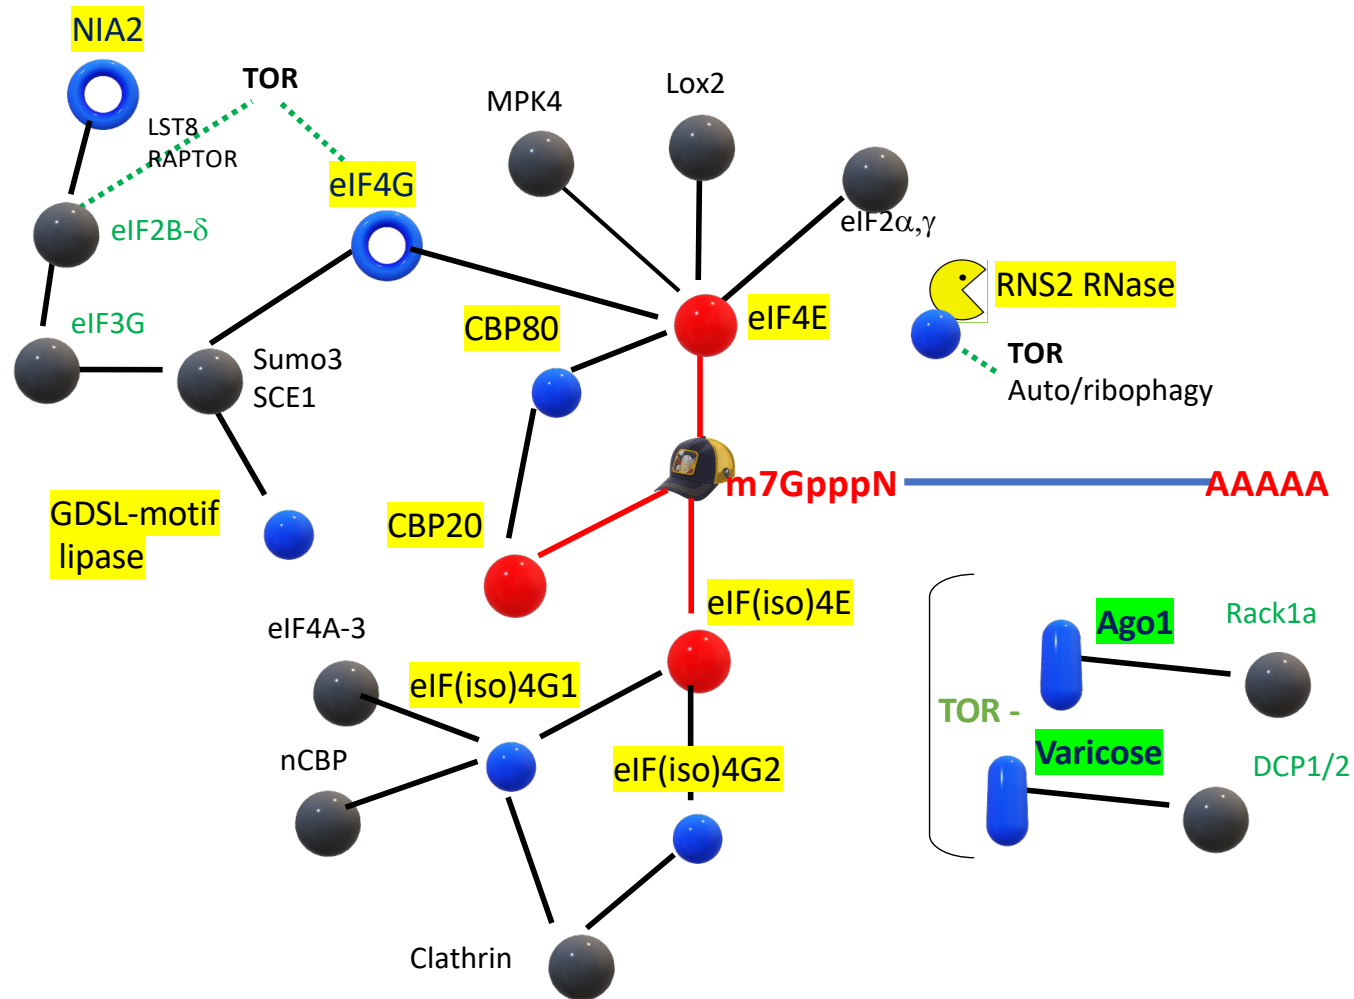

**Figure 1: Identification of core CBC and TOR-dependent components.**

Spheres in blue and red (expected direct interaction with m7GTP, red lines) represent the core CBC found in all control experiments using control Arabidopsis Col-0 plants.

Blue donuts show proteins often but not always detected in the proteomic analyses of the CBC.

Black spheres and lines represent interacting proteins identified in the Biogrid database

Blue cylinders represent the AGO1 and Varicose (VCS) proteins found in all cap-binding affinity purifications when TOR activity was inhibited (RNAi, AZD-8055 treatment).

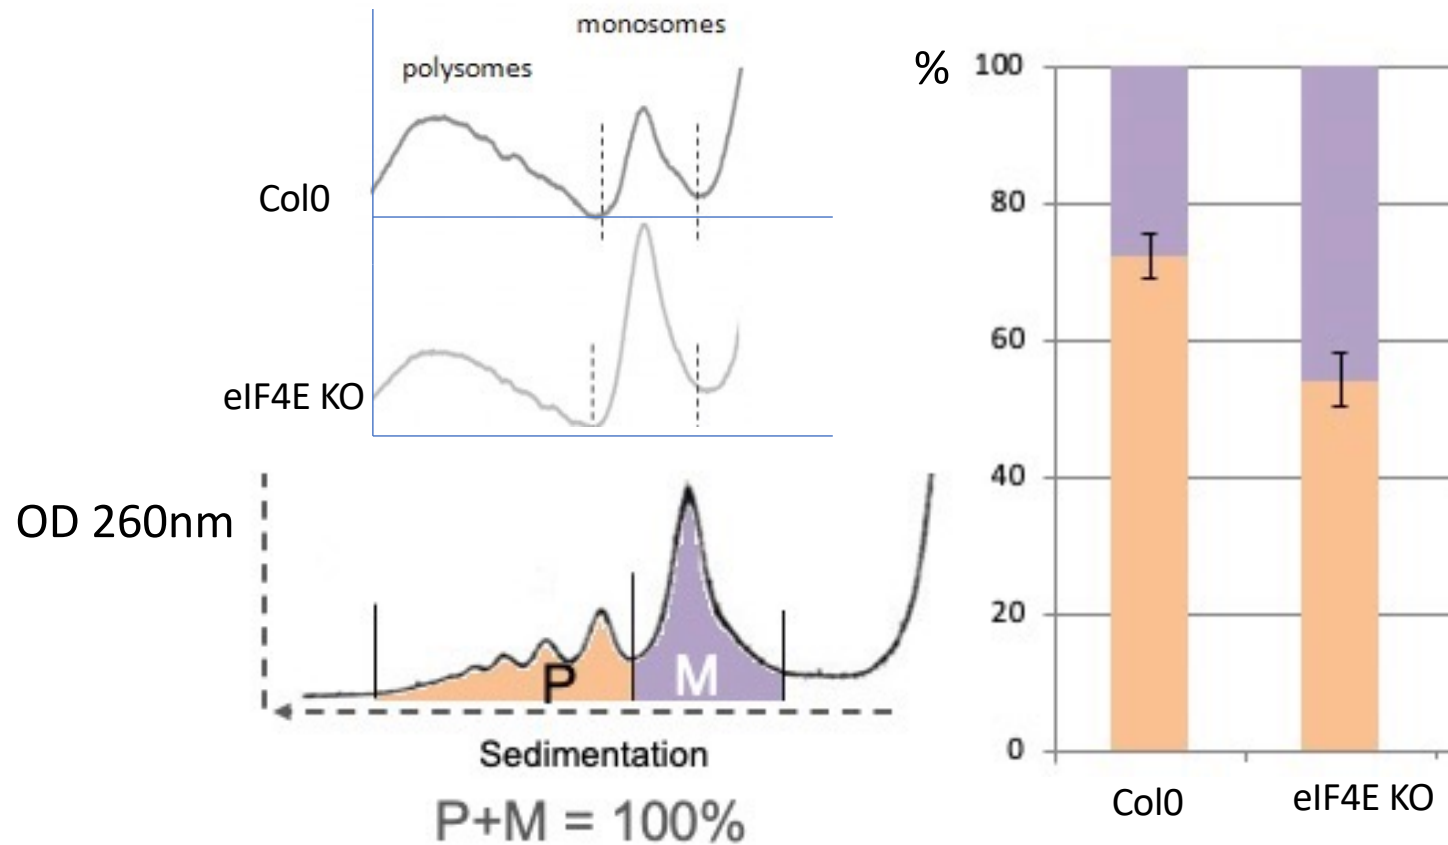

**Figure 2: Polysome profiles of Col-0 and eIF4E KO seedlings.**

The area under the curves of monosomes and polysomes of each profile was integrated to give the graph shown to the right.

Orange, polysomes; violet, monosomes.

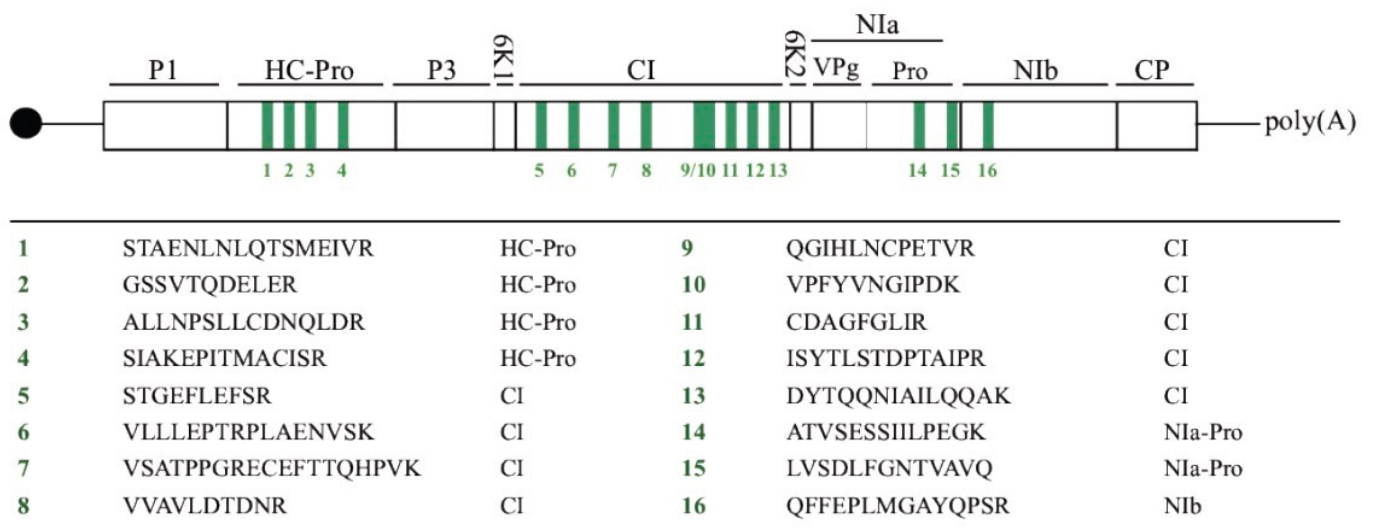

**Figure 3: WMV polyprotein specific peptides identified in the CBC.**  
(see Supplemental Data 6 and 7 for details)
